# Supplementary material
Source: PubMed Central journal article supplement (PMC6041770)
Supplement: ma8b00772_si_001.pdf [file ma8b00772_si_001.pdf]

Supporting Information for:

## **Linear Viscoelasticity of Weakly Hydrogen-Bonded Polymers Near and Below Sol-Gel Transition**

Milad Golkaram,<sup>†</sup> Csaba Fodor,<sup>†</sup> Evelyne van Ruymbeke,<sup>‡</sup> Katja Loos<sup>\*†</sup>

<sup>†</sup>Macromolecular Chemistry and New Polymeric Materials, Zernike Institute for Advanced Materials, University of Groningen, Nijenborgh 4, 9747 AG Groningen, The Netherlands

<sup>‡</sup>Bio-and Soft Matter, Institute of Condensed Matter and Nanosciences, Université Catholique de Louvain, Croix du Sud 1, B-1348 Louvain-la-Neuve, Belgium

\*corresponding author: Tel: +31-50 363 6867; E-mail: k.u.loos@rug.nl

### Table of Contents:

#### **1. Experimental Section**

*1.1. Quantities of the compounds used for RAFT polymerization*

#### **2. Characterization**

*2.1. <sup>1</sup>H NMR of PTHYi*

*2.2. Comparison of low field chemical shifts for the copolymers*

#### **3. Shift factors and the Arrhenius fitting**

## 1. Experimental Section

### 1.1. Quantities of the compounds used for RAFT polymerization

**Table S1.** Amounts of reagents used for the synthesis of the (co)polymers.

| <b>Sample ID</b> | <b>AIBN (mg)</b> | <b>DBTTC (mg)</b> | <b>DMF (mL)</b> | <b>nBA (g)</b> | <b>THY (g)</b> |
|------------------|------------------|-------------------|-----------------|----------------|----------------|
| <b>PnBA</b>      | 0.82             | 14.5              | 5.0             | 1.28           | 0              |
| <b>PTHY10</b>    | 0.82             | 14.5              | 5.0             | 1.15           | 0.32           |
| <b>PTHY30</b>    | 0.82             | 14.5              | 5.0             | 0.64           | 1.62           |
| <b>PTHY100</b>   | 0.82             | 14.5              | 5.0             | 0              | 3.24           |

## 2. Characterization

### 2.1. $^1\text{H}$ NMR of PTHYi

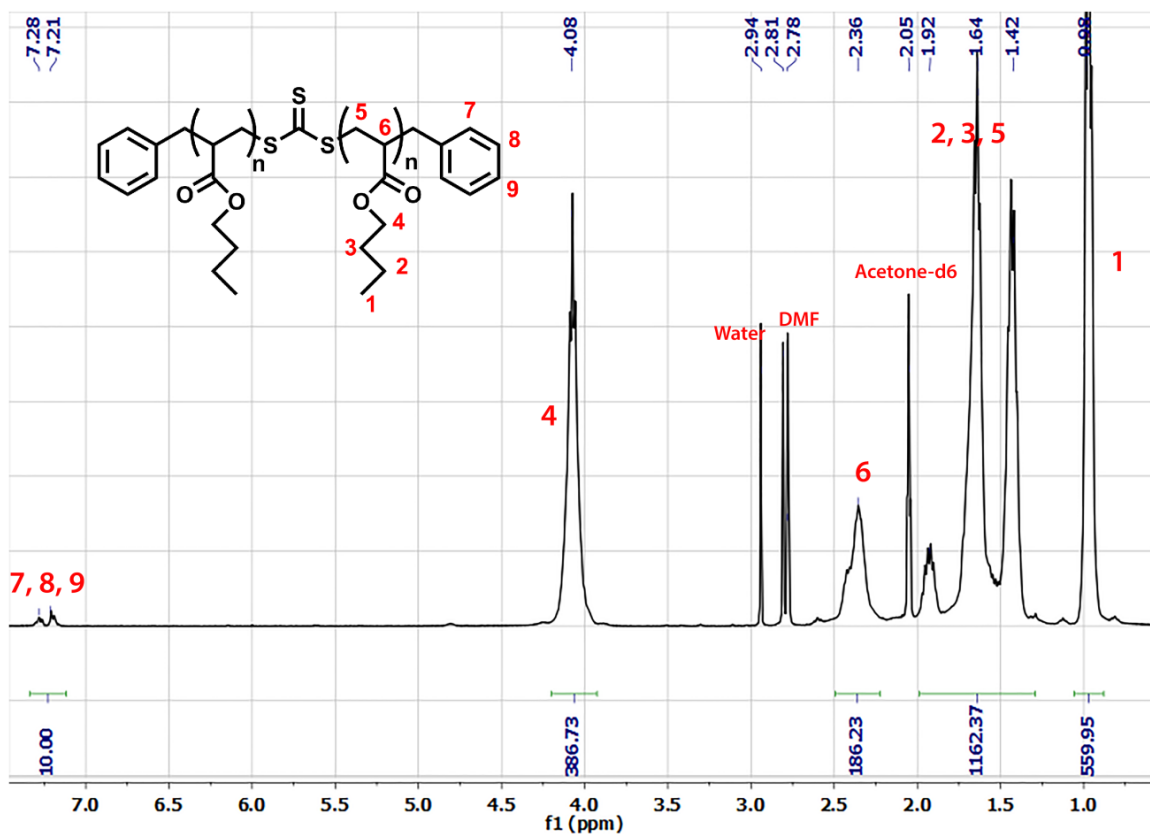

Figure S1.  $^1\text{H}$  NMR spectrum of PnBA.

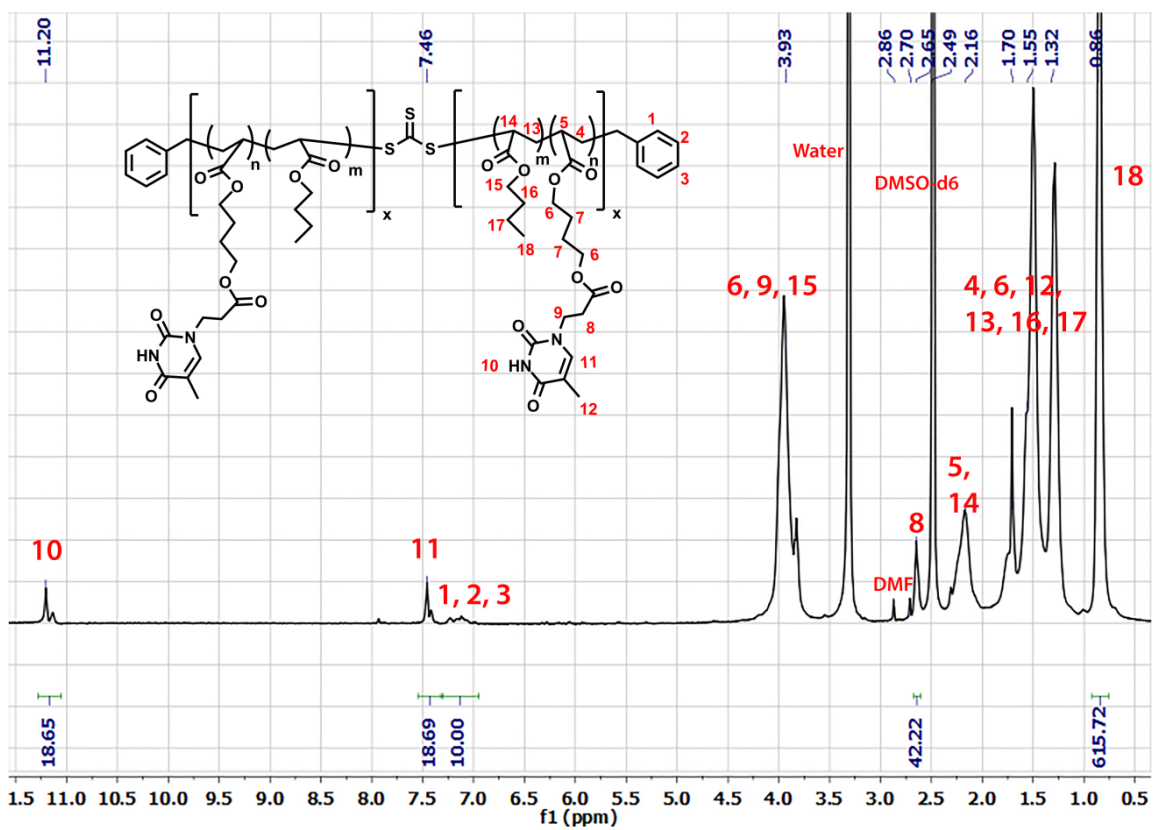

**Figure S2.** <sup>1</sup>H NMR spectrum of PTHY10.

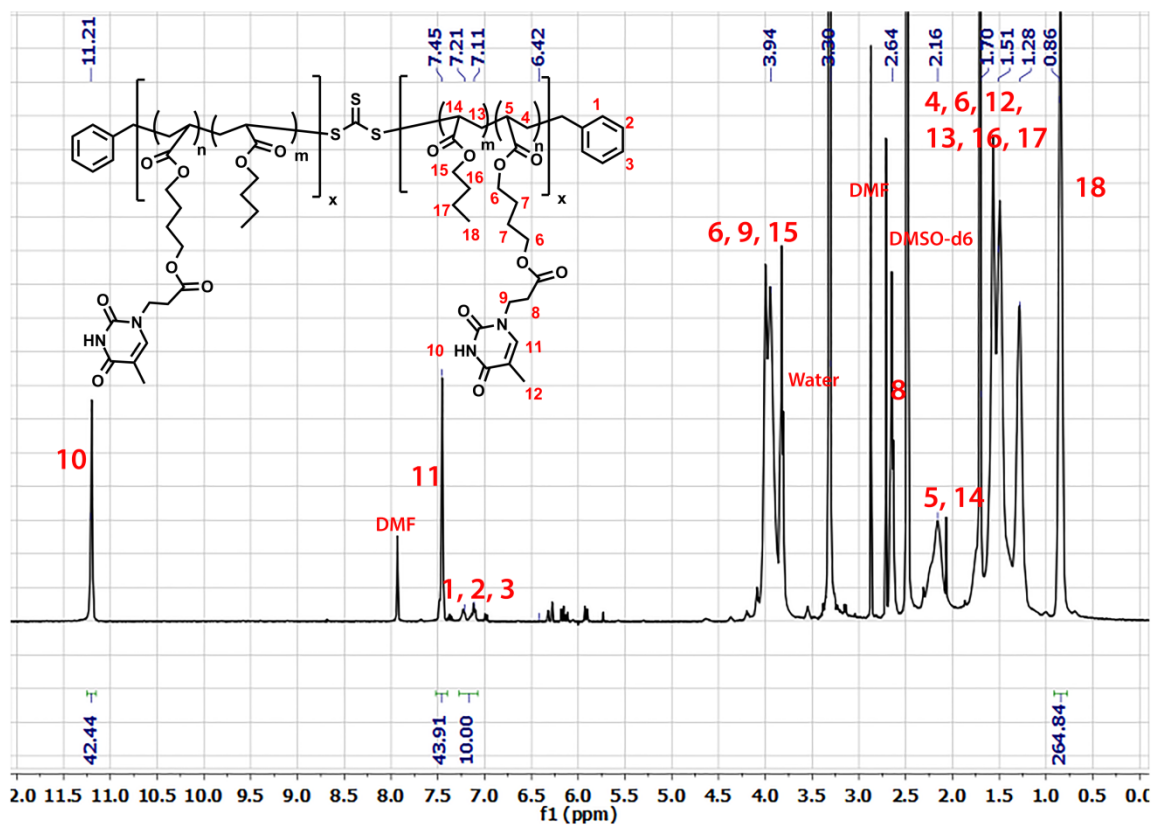

Figure S3. <sup>1</sup>H NMR spectrum of PTHY30.

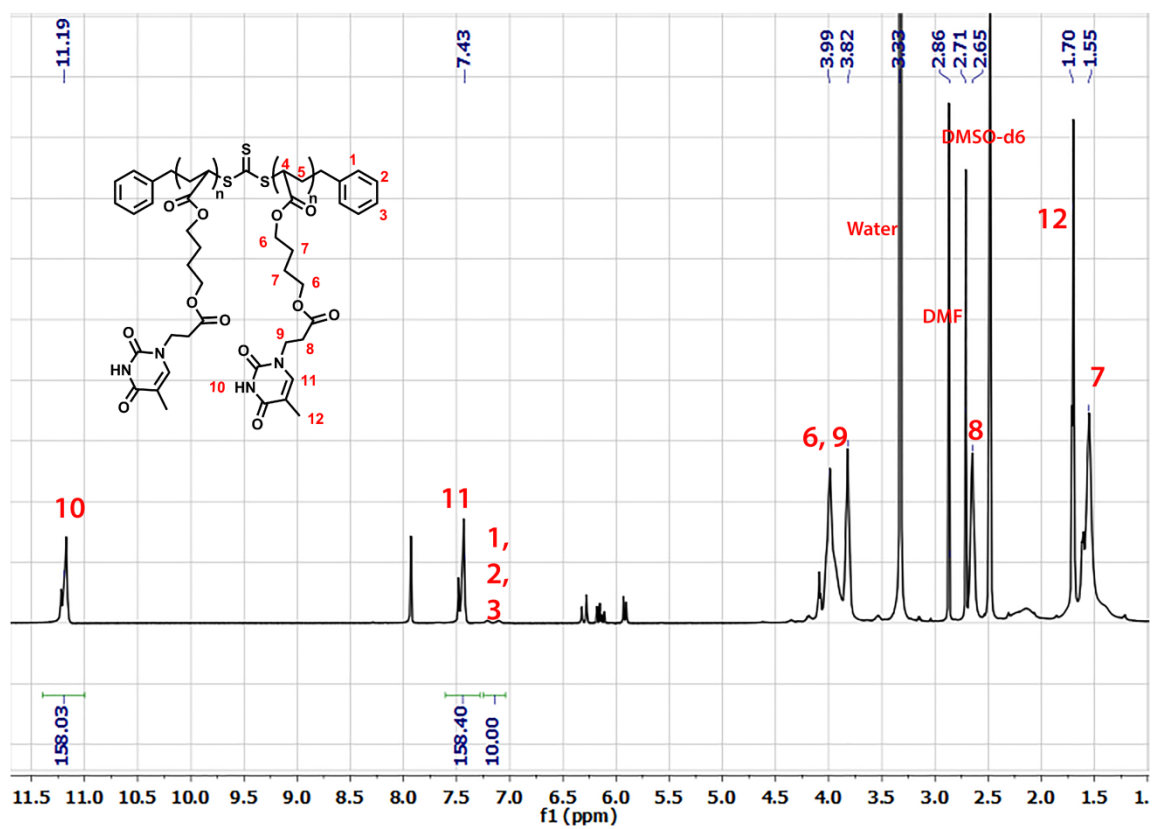

**Figure S4.** <sup>1</sup>H NMR spectrum of PTHY100.

## 2.2. Comparison of low field chemical shifts for the copolymers

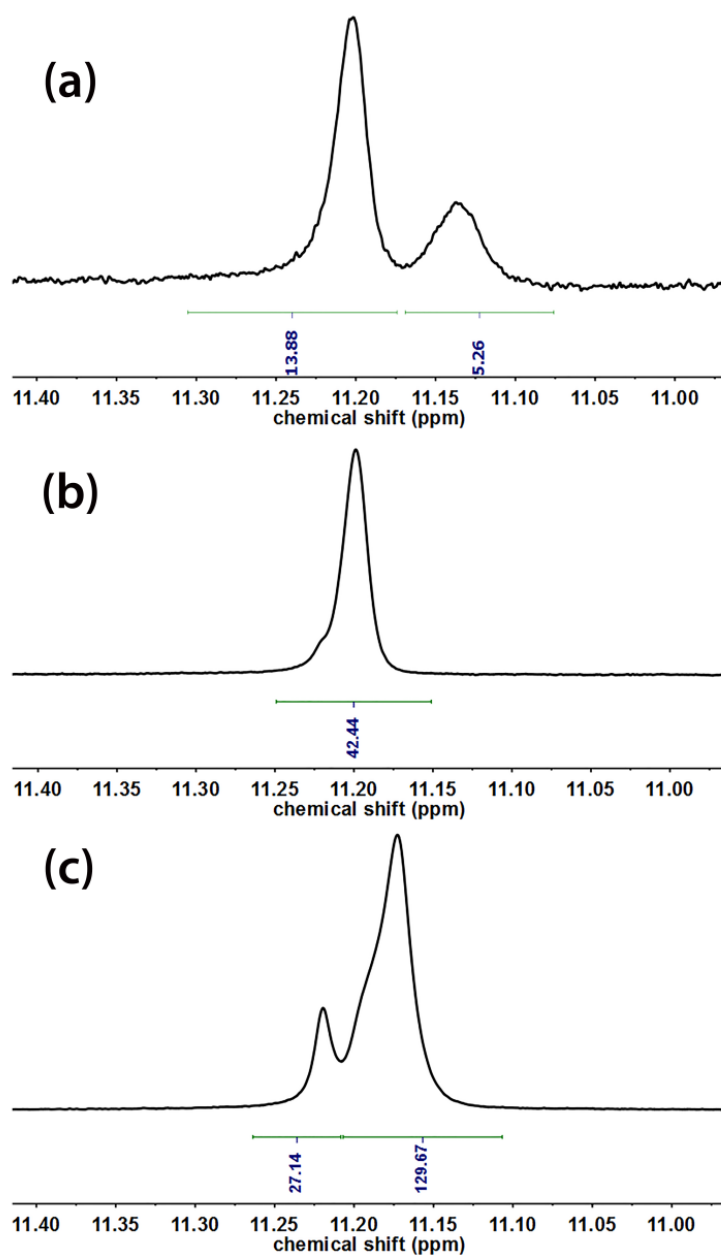

**Figure S5.**  $^1\text{H}$  NMR spectrum of (a) PTHY10, (b) PTHY30, and (c) PTHY100, enlarged at high chemical shifts belonging to the hydrogen bondings of thymine.

### 3. Shift factors and the Arrhenius fitting

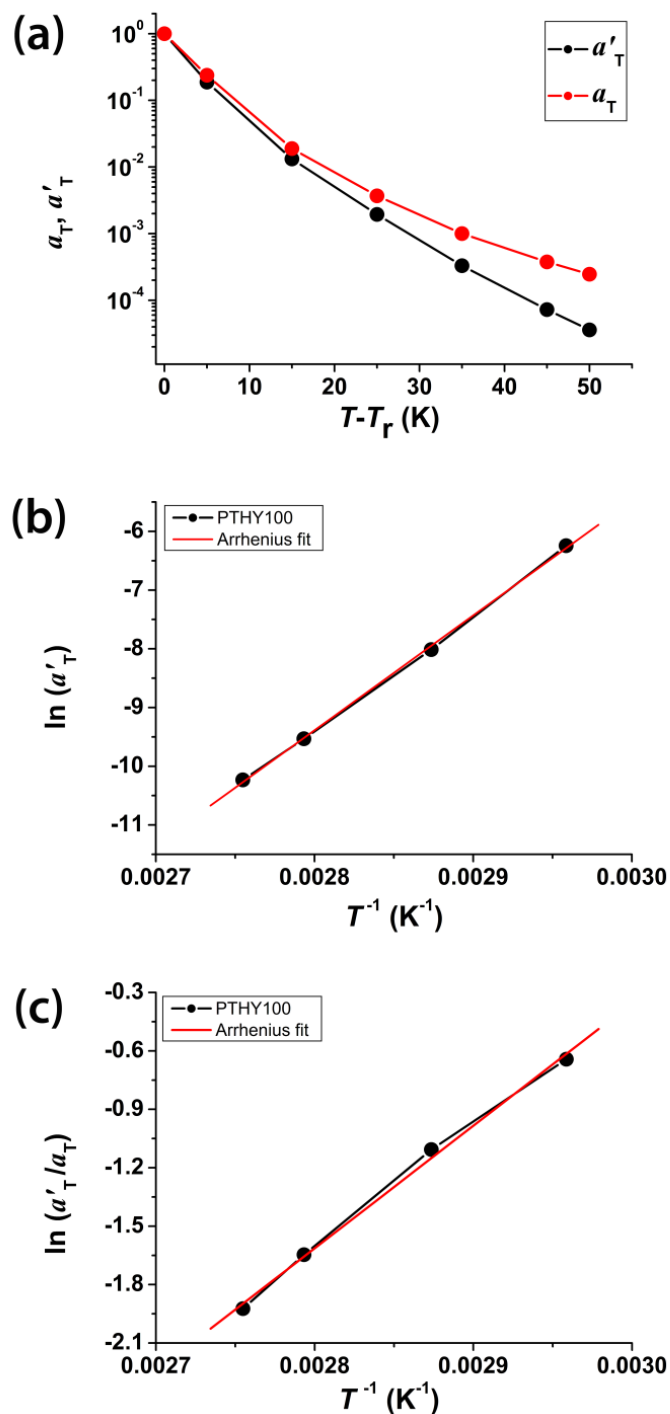

**Figure S6.** Shift factors  $a_T$  and  $a'_T$  vs. (a)  $T - T_r$  and (b)  $1/T$  for PTHY100 (c) ratio of shift factors obtained from the two methods  $a'_T/a_T$  vs.  $1/T$ .
